# Supplementary material for: Reduction-responsive core-crosslinked micelles based on a glycol chitosan–lipoic acid conjugate for triggered release of doxorubicin
Source: Royal Society of Chemistry journal article supplement (doi:10.1039/c6ra05501j), 2016-01-01
Supplement: c6ra05501j1.pdf [file c6ra05501j1.pdf]

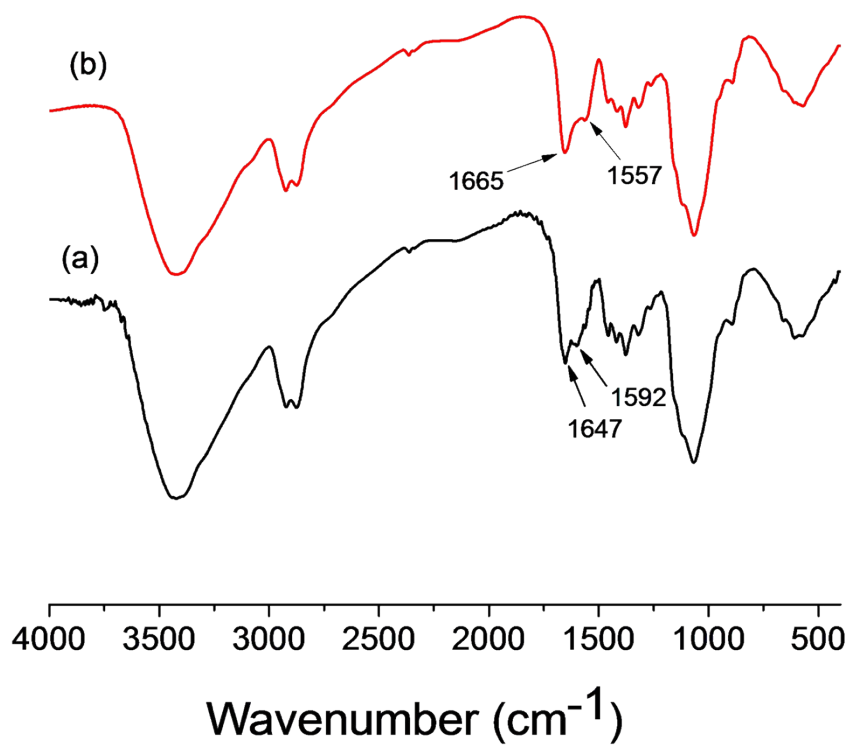

**Fig. S1** Fourier-transform infrared spectra of (a) glycol chitosan and (b) GC-LA.

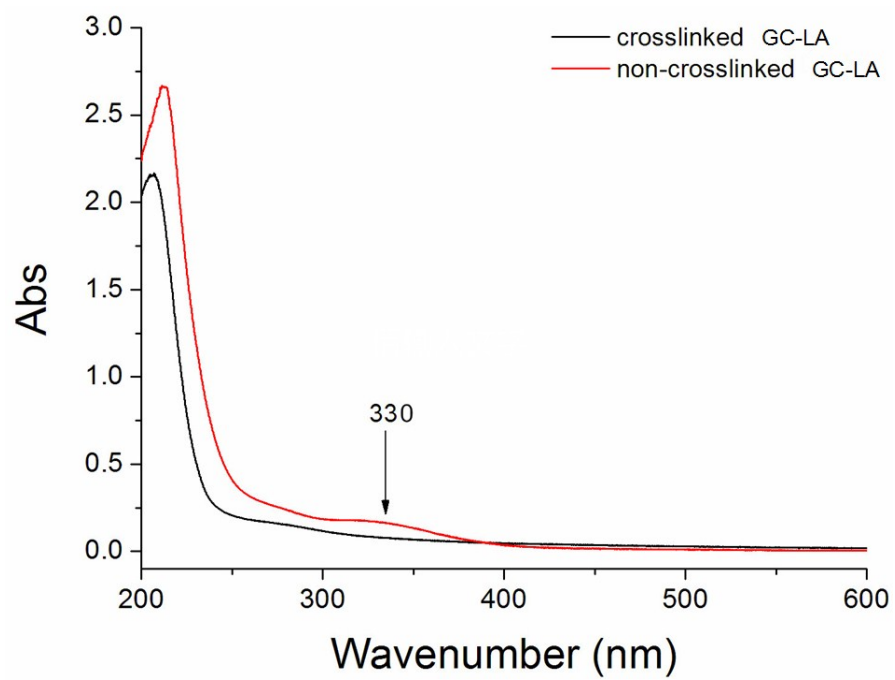

**Fig. S2** UV-vis absorption spectra of GC-LA and GC-LA/cc micelles.

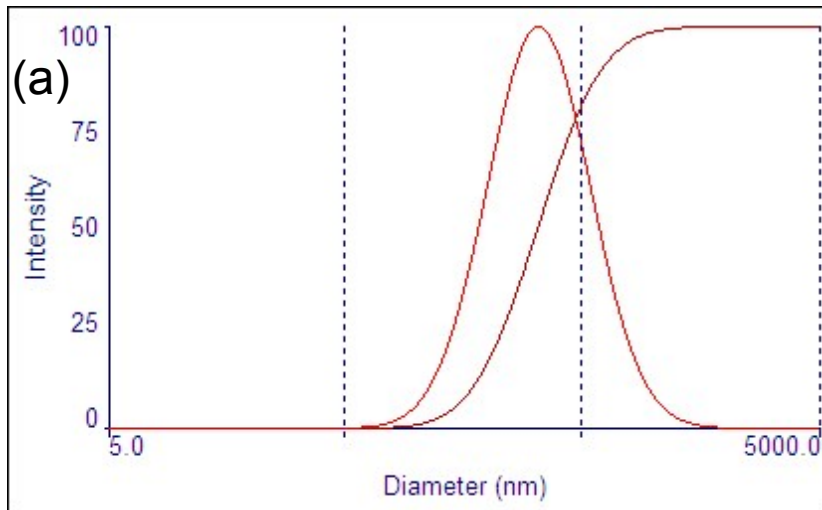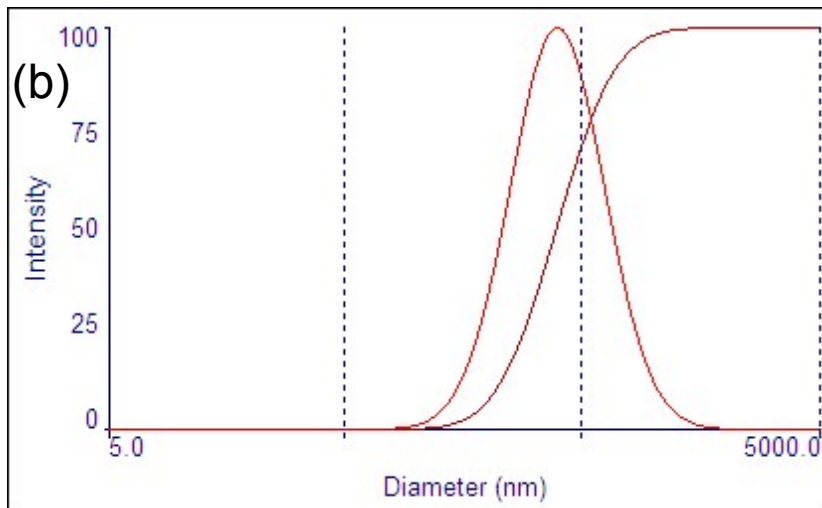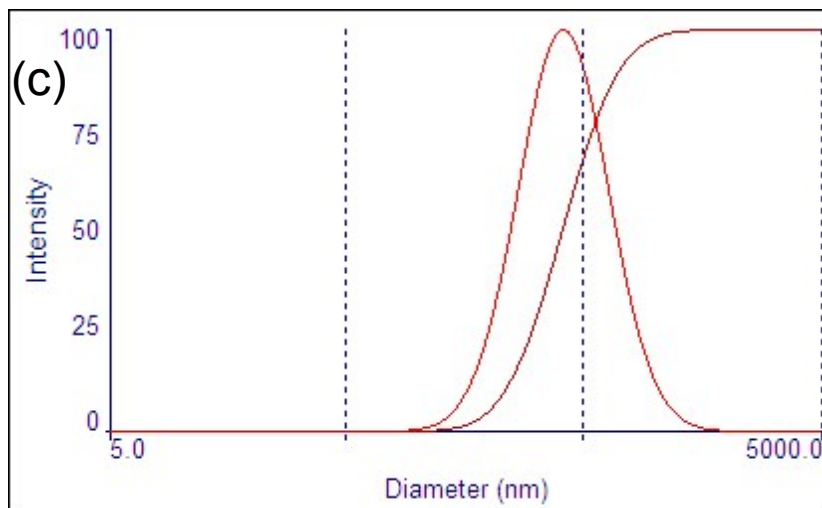

(continued)

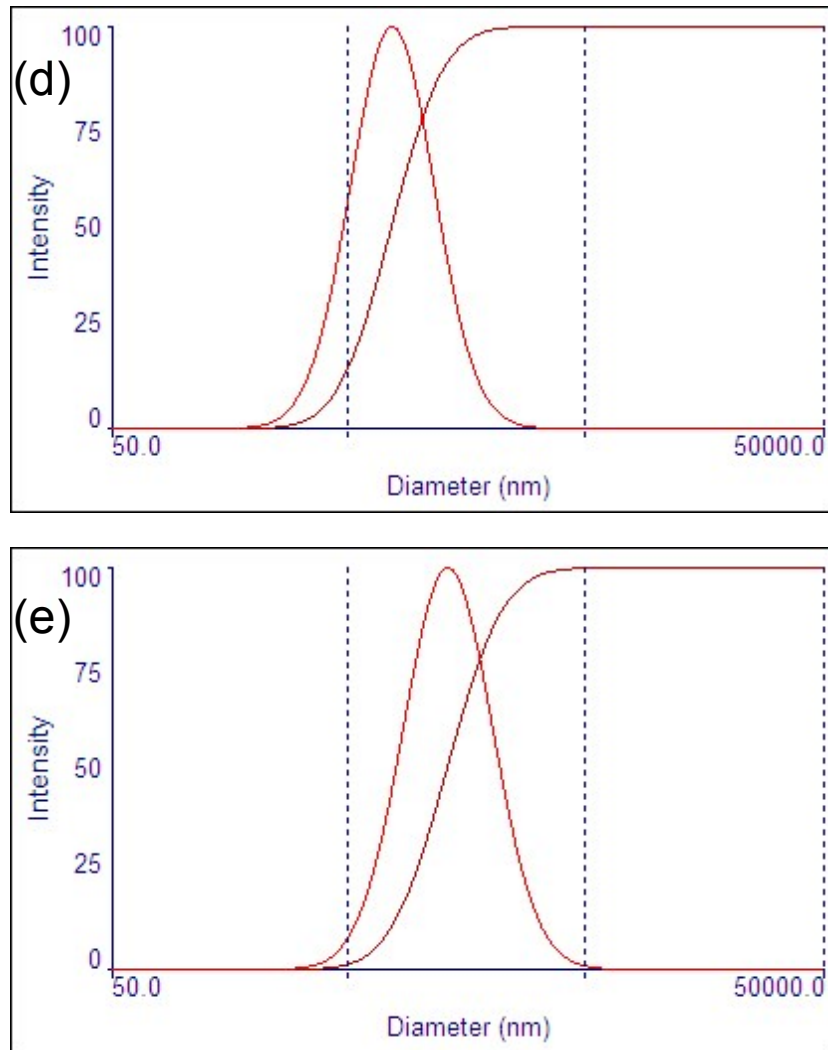

**Fig. S3** The size distribution of DOX-GC-LA/cc micelles in (a) PBS (pH 7.4) for 0 h, (b) PBS (pH 7.4) for 48 h, (c) PBS (pH 7.4) containing 10  $\mu$ M GSH for 48 h, (d) PBS (pH 7.4) containing 3.5 mM GSH for 48 h, and (e) PBS (pH 7.4) containing 20 mM GSH for 48 h.
